# Supplementary material for: CTRP4/interleukin-6 receptor signaling ameliorates autoimmune encephalomyelitis by suppressing Th17 cell differentiation
Source: JCI journal article supplement (doi:10.1172/jci168384), 2023-11-28
Supplement: sd1 [file 1]

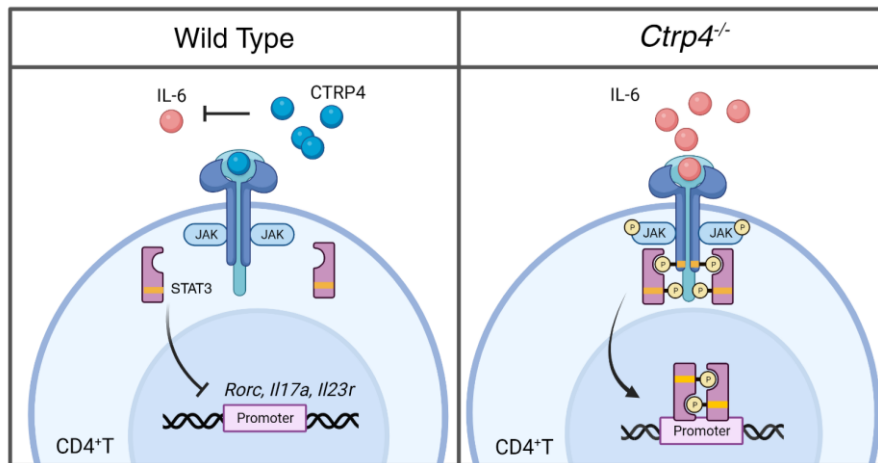

964

965 **Graphical Abstract**

966 **Supplemental Figure**

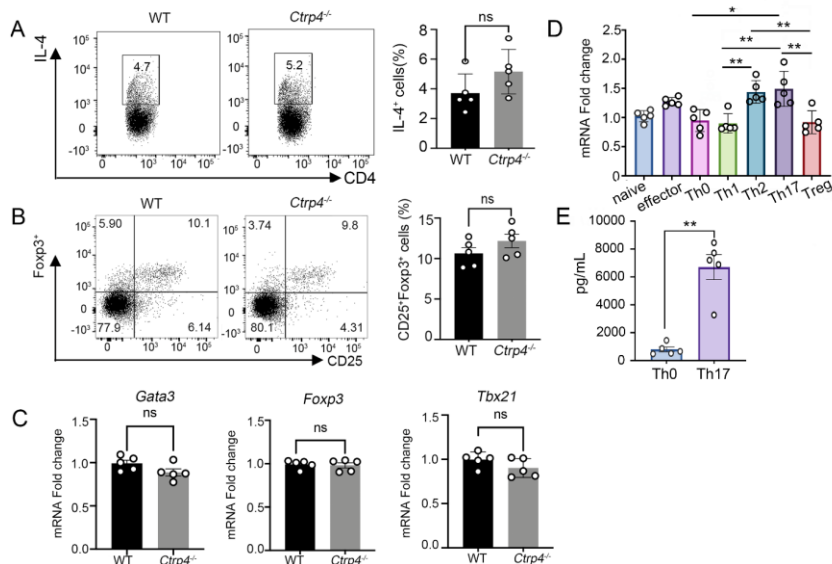

967

968 **Supplementary Figure1: Effect of CTRP4 on T cell subsets**

969 **(A)** Flow cytometry analyses of Th2 effector T cells (CD4<sup>+</sup>CD44<sup>+</sup> IL-4<sup>+</sup> cells) in the spleen of *Ctrp4*<sup>-/-</sup>  
970 and WT mice.

971 **(B)** Flow cytometry analysis of Treg cells (CD4<sup>+</sup>CD25<sup>+</sup>Foxp3<sup>+</sup>) in the spleen of *Ctrp4*<sup>-/-</sup> and WT mice.

972 **(C)** Gene expression levels of *Gata3*, *Foxp3* or *Tbx21* in CD4<sup>+</sup> T cells were analyzed by quantitative  
973 real-time PCR.

974 **(D)** Gene expression of *Ctrp4* was shown as summary bar graph. Naive CD4<sup>+</sup>CD62L<sup>high</sup>CD44<sup>low</sup>CD25<sup>-</sup>  
975 T cells were sorted from WT mice were stimulated with anti-CD3 and anti-CD28 antibodies to obtain  
976 effector CD4<sup>+</sup> T cells, or differentiated towards Th subsets under Th0/1/2/17 or Treg differentiation  
977 condition. Real-time RT-PCR of *Ctrp4* mRNA expression was analyzed and normalized against *Gapdh*.

978 **(E)** The productions of CTRP4 of WT CD4<sup>+</sup>T cells under Th0 or Th17 differentiation conditions were  
979 quantitated by ELISA, respectively. Data were shown as mean ± SEM and were from one of three

980 independent experiments with similar results. one-way ANOVA with Tukey's post-test was used for **D**.  
 981 Statistical significance was determined using unpaired Student t test or Mann-Whitney U test for **A-C**  
 982 and **E**; \*\*p < 0.01, \*\*\*p < 0.001, ns not significance.  
 983

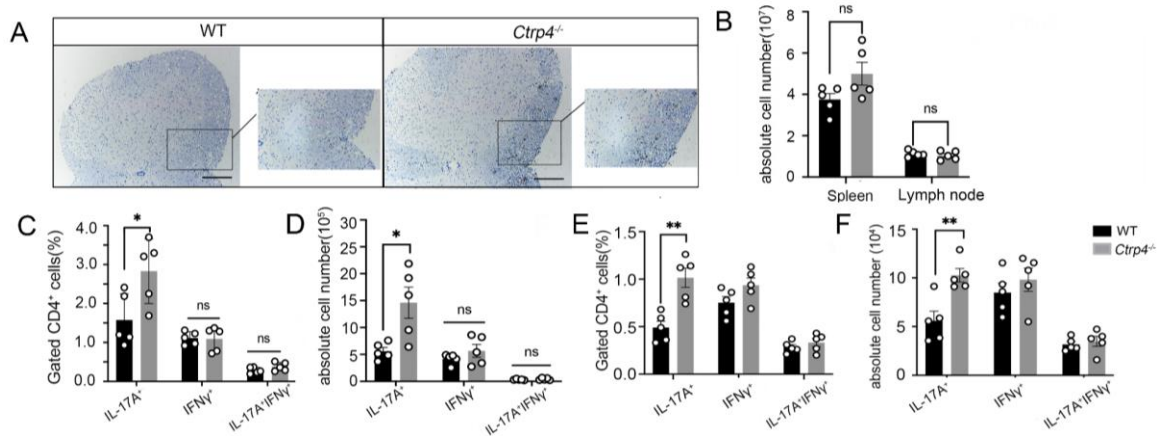

984  
 985 **Supplementary Figure 2: *Ctrlp4* deficiency exacerbates EAE progression with increased**  
 986 **infiltration of CD4<sup>+</sup>IL-17A<sup>+</sup>T cells in the peripheral.**  
 987 **(A)** Representative immunohistochemistry images of CD4 expression in the spinal cord of indicated EAE  
 988 animals at the peak of disease were performed. Scale bar, 100  $\mu$ m.  
 989 **(B)** The summary bar graph showed the absolute number of CD4<sup>+</sup> in spleens and draining lymph nodes  
 990 of *Ctrlp4*<sup>-/-</sup> and WT mice at the peak of disease.  
 991 **(C-D)** Flow-cytometric analysis of the frequencies **(C)** or the absolute cell numbers **(D)** of CD4<sup>+</sup>IL-  
 992 17<sup>+</sup>, CD4<sup>+</sup>IL-17<sup>+</sup>IFN $\gamma$ <sup>+</sup>, CD4<sup>+</sup>IFN $\gamma$ <sup>+</sup> cells in the spleens harvested from WT and *Ctrlp4*<sup>-/-</sup> mice at day18  
 993 postimmunization.  
 994 **(E-F)** Flow-cytometric analysis of the frequencies **(E)** or the absolute cell numbers **(F)** of CD4<sup>+</sup>IL-17<sup>+</sup>,  
 995 CD4<sup>+</sup>IL-17<sup>+</sup>IFN $\gamma$ <sup>+</sup>, CD4<sup>+</sup>IFN $\gamma$ <sup>+</sup> cells in the draining lymph nodes isolated from WT and *Ctrlp4*<sup>-/-</sup> mice at  
 996 day18 postimmunization. Data were shown as mean  $\pm$  SEM and were from one of three independent  
 997 experiments with similar results. Statistical significance was determined using unpaired Student t test or  
 998 Mann-Whitney U test; \*p < 0.05; \*\*p < 0.01, ns not significance.  
 999

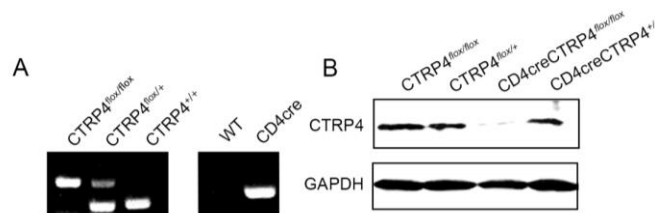

1000  
 1001 **Supplementary Figure 3: The deletion efficacy of T cell condition CTRP4 KO mice**  
 1002 **(A)** Genotyping by PCR analysis of CTRP4<sup>flox/flox</sup>, CTRP4<sup>+/+</sup> and heterozygous mice or PCR analysis of  
 1003 CD4 Cre transgene mice with primers designed for indicated sites.  
 1004 **(B)** CD4<sup>+</sup>T cells from CTRP4<sup>flox/flox</sup>, CTRP4<sup>+/+</sup>, CD4creCTRTP4<sup>flox/flox</sup>, or CD4creCTRTP4<sup>+/+</sup> mice were  
 1005 purified and lysates were subjected to western blot analysis for CTRP4 protein expression.  
 1006

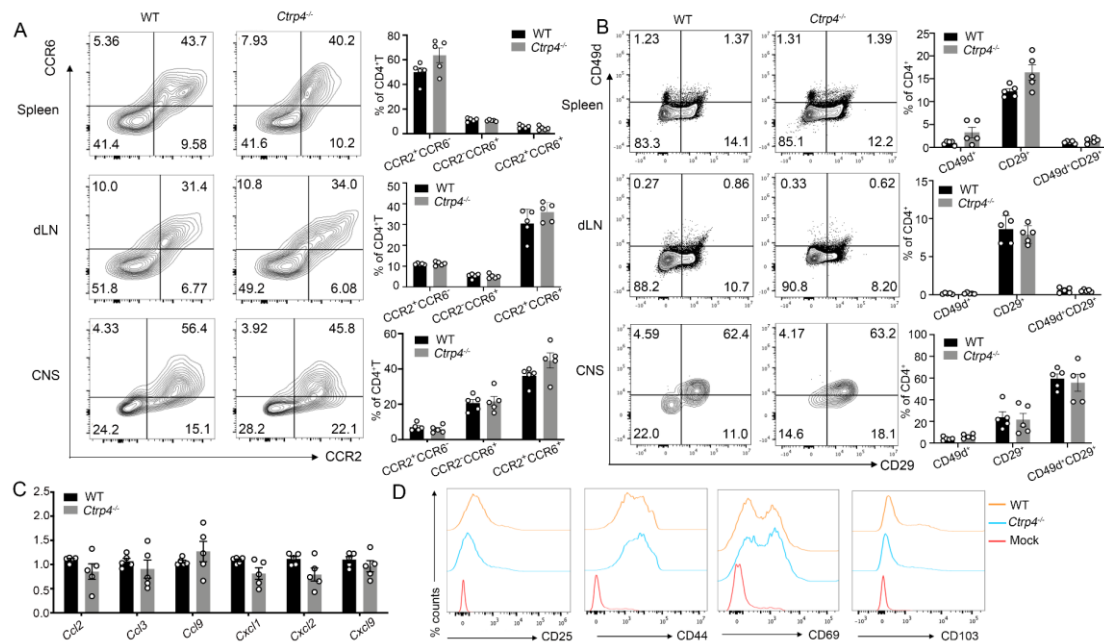

1007

1008

1009

**Supplementary Figure 4: CTRP4 deletion did not affect the ability of Th17 cells to activate or migrate into CNS**

1010

(A) Representative flow cytometric analysis and quantification of CCR6/CCR2 expression in CD4<sup>+</sup>T cells from *Ctrlp4*<sup>-/-</sup> and WT in the dLNs, spleens or CNS on day18 post EAE induction.

1011

(B) Representative flow cytometric analysis and quantification of CD49d and CD29 expression in CD4<sup>+</sup>T cells from spleens, lymph nodes and CNS at peak stage of disease.

1012

(C) Quantitative PCR analysis to determine the expression levels of indicated genes encoding multiple chemokines in spinal cord of MOG<sub>35-55</sub>-immunized *Ctrlp4*<sup>-/-</sup> and WT at the peak of disease.

1013

(D) Comparable activation status of CD4<sup>+</sup>T cells between *Ctrlp4*<sup>-/-</sup> and WT mice on day18 post EAE induction were analyzed by flow cytometry. Data were shown as mean ± SEM and were from one of three independent experiments with similar results. Statistical significance was determined using unpaired Student t-test or Mann-Whitney U test.

1014

1015

1016

1017

1018

1019

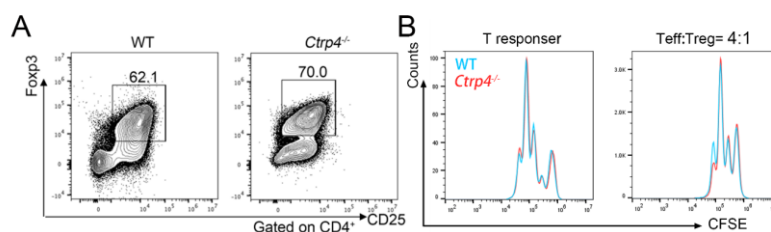

1020

1021

**Supplementary Figure 5: The in vitro differentiation ability of naïve CD4<sup>+</sup>T cells into Treg cells was not impaired in CTRP4 KO mice**

1022

(A) Naïve CD4<sup>+</sup>CD62L<sup>high</sup>CD44<sup>low</sup>CD25<sup>-</sup>T cells were sorted from WT and *Ctrlp4*<sup>-/-</sup> mice, and differentiated with 5 ng/ml TGFβ1 and 5 ng/ml IL-2 for 5 days. Numbers adjacent to outlined areas indicated the percentage of CD4<sup>+</sup>CD25<sup>+</sup>Foxp3<sup>+</sup> cells.

1023

(B) CFSE-labeled effector CD4<sup>+</sup>T cells were cocultured with WT and *Ctrlp4*<sup>-/-</sup>Treg cells to conduct the Treg suppression assay. The suppression capacity was determined through CFSE dilution when effector T cells cultured at a 4:1 ratio with Treg cells. Data were from one of three independent experiments with similar results.

1024

1025

1026

1027

1028

1029

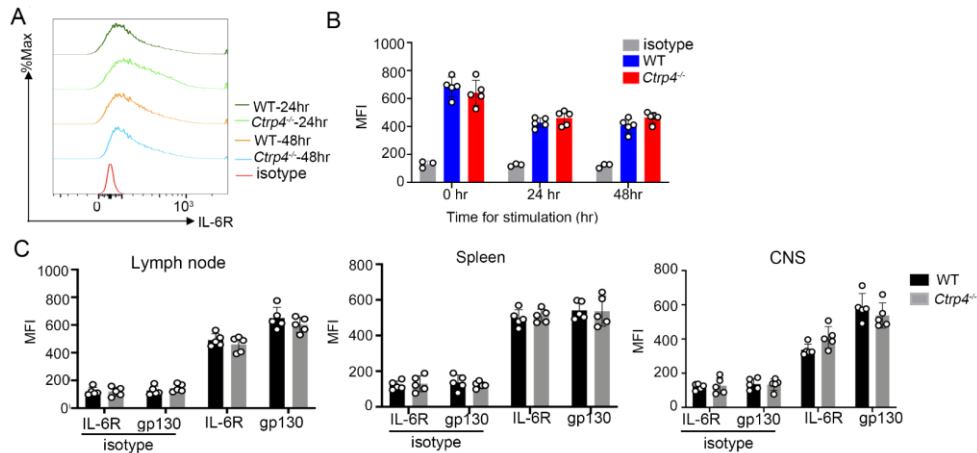

1031

1032 **Supplementary Figure 6: Ctrp4 deficiency did not alter the expression level of IL-6R**

1033 (A) The representative histograms showed the expression level of IL-6R on purified wild-type and *Ctrp4*<sup>-/-</sup>  
 1034 <sup>-/-</sup> naïve CD4<sup>+</sup>T cells stimulated with anti-CD3 and anti-CD28 for indicated time.

1035 (B) Flow cytometric analysis of the mean fluorescence intensity (MEI) of IL-6R on purified wild-type  
 1036 and *Ctrp4*<sup>-/-</sup> naïve CD4<sup>+</sup>T cells stimulated with anti-CD3 and anti-CD28 for indicated time. Isotype  
 1037 means isotype-matched control antibody.

1038 (C) Flow cytometric analysis of the mean fluorescence intensity (MEI) of gp130 or IL-6R on CD4<sup>+</sup> T  
 1039 cells isolated from CNS and peripheral lymphoid organs of *Ctrp4*<sup>-/-</sup> and WT mice on day18 post EAE  
 1040 induction. Data were shown as mean ± SEM and were from one of three independent experiments with  
 1041 similar results. Statistical significance was determined using unpaired Student t-test or Mann-Whitney  
 1042 U test.

1043

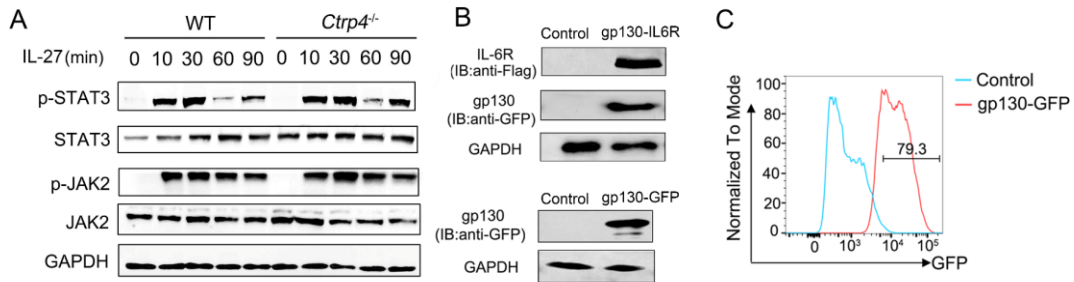

1044

1045 **Supplementary Figure 7: CTRP4 responded to IL-6 rather than other gp130 family cytokines**

1046 (A) Purified CD4<sup>+</sup>T cells from *Ctrp4*<sup>-/-</sup> and WT mice were stimulated with IL-27 (50 ng/mL) for indicated  
 1047 time. Lysates were subjected to western blot analysis for phosphorylated JAK2, p-JAK2, p-STAT3,  
 1048 STAT3 and GAPDH (as a control). The samples derived from the same experiment and that gels/blots  
 1049 were processed in parallel.

1050 (B) The expression levels of gp130 and IL-6R in Ba/F3-gp130-IL-6R cells lysates were analyzed  
 1051 by indicated antibodies (up). The expression level of gp130 in Ba/F3-gp130 cells lysates was  
 1052 analyzed by anti-GFP antibodies (bottom).

1053 (C) Flow cytometric analysis of the expression of gp130 in Ba/F3-gp130 cells. Data were from one  
 1054 of three independent experiments with similar results.

1055

| Gene          | Forward Primer          | Reverse Primer           |
|---------------|-------------------------|--------------------------|
| <i>Il17a</i>  | CTCCAGAAGGCCCTCAGACTC   | GGGTCTTCATTGCGGTGG       |
| <i>Ifng</i>   | TCGAATCGCACCTGATCACTA   | GGGTTGTTACCTCGAACTTG     |
| <i>Rorc</i>   | CCGCTGAGAGGGCTTCAC      | TGCAGGAGTAGGCCACATTAC    |
| <i>Il17f</i>  | CCCCATGGGATTACAACATCC   | CATTGATGCAGCCTGAGTGTT    |
| <i>Il23r</i>  | AACATGACATGCACCTGGAA    | TCCATGCCTAGGGAATTGAC     |
| <i>Foxp3</i>  | CCCATCCCCAGGAGTCTTG     | ACCATGACTAGGGGCACTGTA    |
| <i>Tbx21</i>  | GCCAGGGAACCGGTTATATG    | GACGATCATCTGGGTCACAT     |
| <i>Gata3</i>  | AAGCTCAGTATCCGCTGACG    | GTTTCCGTAGTAGGACGGGAC    |
| <i>Il6ra</i>  | CATTGCCATTGTTCTGAGGTTC  | AGTAGTCTGTATTGCTGATGTC   |
| <i>Gapdh</i>  | GACTTCAACAGCAACTCCCAC   | TCCACCACCCTGTTGCTGTA     |
| <i>Ccl2</i>   | CCGGCTGGAGCATCCACGTGT   | TGGGGTCAGCACAGACCTCTCTCT |
| <i>Ccl20</i>  | CGACTGTTGCCTCTCGTACA    | GAGGAGGTTACAGCCCTTT      |
| <i>Cxcl1</i>  | CACAGGGGCGC CTATCGCCAA  | CAAGGCAAGCCTCGCGACCAT    |
| <i>Cxcl2</i>  | ACCCCACTGCGCCAGACAGAA   | AGCAGCCCAGGCTCCTCCTTTCC  |
| <i>Ccl3</i>   | TGTACCATGACACTCTGCAAC   | CAACGATGAATTGGCGTGAA     |
| <i>Cx3cl1</i> | ACGAAATGCGAAATCATG TGC  | CTGTGTCGTCTCCAGGACAA     |
| <i>Ccl9</i>   | CCCTCTCCTTCCTCATTCTTACA | AGTCTTGAAAGCCCATGTGAAA   |
| <i>Cxcl9</i>  | TCCTTTTGGGCATCATCTTCC   | TTGTAGTGGATCGTGCCTCG     |
| <i>Cxcl11</i> | GGCTTCCTTATGTTCAAACAGGG | GCCGTTACTCGGGTAAATTACA   |
